# Supplementary material for: The satisfaction regarding handovers between ambulance and emergency department nurses: an observational study
Source: Springer Nature journal article supplement (doi:10.1186/s13049-018-0545-7), 2018-09-10
Supplement: MOESM1 [file 16111232]

# Additional file 1

Patient number

Subject number:

Subject nummer

# Case Report Form

Handover from Ambulance to Emergency Department

## G00. General Information

---

Date screening (day/month/year):

 /  / 

Data collected by:.....

Verbal informed consent given:

Yes

No

Gender:

Male

Female

Age:

Specialism:

Urgency CPA towards patient:

A1

A2

Urgency CPA towards ED:

A1

A2

Triage by ED:

Red

Orange

Yellow

Reason of referral:

Circulatory

Respiratory

Digestive

Urogenital

Musculoskeletal

Endocrine

Central nerve system

Hematological

Other

## G01. Pre-Hospital information

G01-01: Estimated Time of Arrival:

 : 

G01-02: Refferer:

General Practitioner

CPA

Other hospital

G01-03: Pre-Hospital information received:

Yes

No

Subject nummer

|  |  |  |  |  |  |
|--|--|--|--|--|--|
|  |  |  |  |  |  |
|--|--|--|--|--|--|

G01-04: Pre-hospital information by:

GP  Medical expert

MKA

Ambulance digitally

Ambulance phone

## G02. Vital parameters

|                                | First values by ambulance | MEWS | Values during handover | Parameters mentioned during handover | MEWS | First values on the ED | MEWS |
|--------------------------------|---------------------------|------|------------------------|--------------------------------------|------|------------------------|------|
| Respiratory rate per minute    |                           |      |                        | Yes/No                               |      |                        |      |
| O2 saturation (%)              |                           |      |                        | Yes/No                               |      |                        |      |
| Temperature (°C)               |                           |      |                        | Yes/No                               |      |                        |      |
| Systolic blood pressure (mmHg) |                           |      |                        | Yes/No                               |      |                        |      |
| Heart rate per minute          |                           |      |                        | Yes/No                               |      |                        |      |
| Consciousness                  |                           |      |                        | Yes/No                               |      |                        |      |

Oxygenation:

NRM

Ventimask

O2-glasses

None

Oxygen in liters per minute:

|  |  |
|--|--|
|  |  |
|--|--|

| <b>MODIFIED EARLY WARNING SCORE - UMCg</b>          |          |          |             |                       |          |                      |          |
|-----------------------------------------------------|----------|----------|-------------|-----------------------|----------|----------------------|----------|
| <b>Score</b>                                        | <b>3</b> | <b>2</b> | <b>1</b>    | <b>0</b>              | <b>1</b> | <b>2</b>             | <b>3</b> |
| <b>Respiratory Rate</b>                             |          | <9       |             | 9-14                  | 15-20    | 21-30                | >30      |
| <b>Heart Rate</b>                                   |          | <40      | 40-50       | 51-100                | 101-110  | 111-130              | >130     |
| <b>Systolic blood Pressure</b>                      | <70      | 70-80    | 81-100      | 101-200               |          | >200                 |          |
| <b>Consciousness</b>                                |          |          |             | A                     | V        | P                    | U        |
| <b>Temperature</b>                                  |          | <35.1    | 35.1 - 36.5 | 36.6 - 37.5           | >37.5    |                      |          |
| <b>Saturation</b>                                   | <90%     | <92%     | <95%        | >95%                  |          |                      |          |
| A = Alert                                           |          |          |             | V = Response on voice |          | P = Response on pain |          |
|                                                     |          |          |             |                       |          | U = No response      |          |
| If production of urine < 75ml in the last 4 hours   |          |          |             |                       |          | Add 1 point          |          |
| In case of worries about clinical status of patient |          |          |             |                       |          | Add 1 point          |          |

Subject nummer

|  |  |  |  |  |  |
|--|--|--|--|--|--|
|  |  |  |  |  |  |
|--|--|--|--|--|--|

### G03. Preparation by ED

G03-01: Team prepared:

Yes

No

G03-02: Preparation: Teamwork and consultation

Preparation of instrumentation

### G04. Handover

G04-01: Amount of patients in waiting room:

|  |  |
|--|--|
|  |  |
|--|--|

G04-02: Amount of patients on ED:

|  |  |
|--|--|
|  |  |
|--|--|

G04-03: Time of entrance ED:

|  |  |
|--|--|
|  |  |
|--|--|

|  |  |
|--|--|
|  |  |
|--|--|

G04-04: Time of entrance room:

|  |  |
|--|--|
|  |  |
|--|--|

|  |  |
|--|--|
|  |  |
|--|--|

G04-05: Time of arrival nurse :

|  |  |
|--|--|
|  |  |
|--|--|

|  |  |
|--|--|
|  |  |
|--|--|

G04-06: Time of arrival physician:

|  |  |
|--|--|
|  |  |
|--|--|

|  |  |
|--|--|
|  |  |
|--|--|

G04-07: Time start of handover:

|  |  |
|--|--|
|  |  |
|--|--|

|  |  |
|--|--|
|  |  |
|--|--|

G04-08: Time of stop handover:

|  |  |
|--|--|
|  |  |
|--|--|

|  |  |
|--|--|
|  |  |
|--|--|

G04-09: Waiting time until handover:

|  |  |
|--|--|
|  |  |
|--|--|

minutes

G04-10: Duration of handover:

|  |  |
|--|--|
|  |  |
|--|--|

minutes

Subject nummer

|  |  |  |  |  |  |
|--|--|--|--|--|--|
|  |  |  |  |  |  |
|--|--|--|--|--|--|

**Team ED**

G04-11: ED Nurse present: During whole handover  Partly  Absent   
If partly ↓

More than half of the time  Less than half of the time

G04-12: Physician present During whole handover  Partly  Absent   
If partly ↓

More than half of the time  Less than half of the time

**Handover instrument**

G04-13 Use of handover instrument:

| ABCDE                                           | AMPLE                               | SBAR                                    |
|-------------------------------------------------|-------------------------------------|-----------------------------------------|
| Airway <input type="checkbox"/>                 | Allergy <input type="checkbox"/>    | Situation <input type="checkbox"/>      |
| Breathing <input type="checkbox"/>              | Medication <input type="checkbox"/> | Background <input type="checkbox"/>     |
| Circulation <input type="checkbox"/>            | Past <input type="checkbox"/>       | Assessment <input type="checkbox"/>     |
| Disability <input type="checkbox"/>             | Last meal <input type="checkbox"/>  | Recommendation <input type="checkbox"/> |
| Exposure <input type="checkbox"/>               | Events <input type="checkbox"/>     |                                         |
| G04-14: Correct order: <input type="checkbox"/> | <input type="checkbox"/>            | <input type="checkbox"/>                |

G04-15: Ambulance mentioned administered medication: Yes  No

G04-16: Mentioned medication corresponds with pre-hospital information: Yes  No

G04-17: Mechanism of injury mentioned by ambulance: Yes  No

G04-18: Interruptions during handover : Yes  No

G04-19: Verifying questions asked by ED personell: Yes  No

G04-20: Clarifying questions asked by ED personell: Yes  No

G04-21: Transfer of patient before or after handover: Before  After
