# Supplementary material for: The satisfaction regarding handovers between ambulance and emergency department nurses: an observational study
Source: Springer Nature journal article supplement (doi:10.1186/s13049-018-0545-7), 2018-09-10
Supplement: MOESM2 [file 16111232]

# Additional file 2

Subject nummer

|  |  |  |  |  |  |
|--|--|--|--|--|--|
|  |  |  |  |  |  |
|--|--|--|--|--|--|

Years of work experience on the ambulance

|  |  |
|--|--|
|  |  |
|--|--|

**Score satisfaction of handover**

**Completed by:**

- Ambulance Nurse

**I am satisfied with this handover**

- Strongly disagree  
 Disagree  
 Neutral  
 Agree  
 Strongly agree

**Improvement needed regarding this handover**

- Composition of ED team  
 Timing of handover  
 Questions asked by ED team  
 Interruptions during handover  
 Waiting time too long  
 Duration of handover  
 Other .....

**Good factors regarding this handover**

- Composition of ED team  
 Timing of handover  
 Questions asked by ED team  
 No interruptions during handover  
 Waiting time  
 Duration of handover  
 ED Team listened carefully  
 Other .....

Subject nummer

|  |  |  |  |  |  |
|--|--|--|--|--|--|
|  |  |  |  |  |  |
|--|--|--|--|--|--|

Years of work experience on the ED

|  |  |
|--|--|
|  |  |
|--|--|

**Score satisfaction ED personell**

Completed by:

- ED nurse
- Physician

I am satisfied with this handover

- Strongly disagree
- Disagree
- Neutral
- Agree
- Strongly agree

**Improvement needed regarding this handover**

- Pre-hospital information insufficient
- No use of handover instrument (ABCDE, AMPLE, SBAR)
- Incomplete handover
- Timing of handover
- Interruptions during handover
- Waiting time until handover
- Duration of handover
- Other: .....

**Good factors regarding this handover**

- Pre-hospital information
- Use of handover instrument (ABCDE, AMPLE, SBAR)
- Complete handover
- Timing of handover
- No interruptions
- Waiting time until handover
- Duration of handover
- Listened carefully
- Other .....

Correct medical information received

Incorrect medical information received

Diagnosis mentioned

No diagnosis mentioned
